# Supplementary material for: Hydrogel-mediated topical delivery of steroids can effectively alleviate psoriasis via attenuating the autoimmune responses
Source: Royal Society of Chemistry journal article supplement (doi:10.1039/d1nr06001e), 2022-01-01
Supplement: d1nr06001e1.pdf [file d1nr06001e1.pdf]

## Supporting Information

# Hydrogel-mediated Topical Delivery of Steroids Can Effectively Alleviate Psoriasis via Attenuating the Autoimmune Responses.

Kajal Rana,<sup>1</sup> Trishna Pani,<sup>2</sup> Somesh Kumar Jha,<sup>1</sup> Devashish Mehta,<sup>2</sup> Poonam Yadav,<sup>1</sup> Dolly Jain,<sup>1</sup> Manas Kumar Pradhan,<sup>3</sup> Sarita Mishra,<sup>4</sup> Raunak Kar,<sup>5</sup> Betsy Reshma G,<sup>4</sup> Aasheesh Srivastava,<sup>3</sup> Ujjaini Dasgupta,<sup>2</sup> Veena S. Patil,<sup>5,\*</sup> and Avinash Bajaj<sup>1,\*</sup>

1. Laboratory of Nanotechnology and Chemical Biology, Regional Centre for Biotechnology, NCR Biotech Science Cluster, 3<sup>rd</sup> Milestone, Faridabad-Gurgaon Expressway, Faridabad-121001, Haryana, India.

2. Amity Institute of Integrative Sciences and Health, Amity University Haryana, Panchgaon, Manesar, Gurgaon-122413, Haryana, India.

3. Department of Chemistry, Indian Institute of Science Education and Research, Bhauri, Bhopal By-pass Road, Bhopal-462066, India.

4. CSIR- Institute of Genomics and Integrative Biology, South Campus, Mathura Road, Near to Sukhdev Vihar, New Delhi, Delhi 110025, India.

5. National Institute of Immunology, Aruna Asaf Ali Marg, New Delhi-110067.

### Corresponding authors:

\* Veena S. Patil, Email: [veena@nii.ac.in](mailto:veena@nii.ac.in)

\*Avinash Bajaj, Email: [bajaj@rcb.res.in](mailto:bajaj@rcb.res.in)

## Effect of Dexamethasone entrapped Gel (DEX-Gel) in Chronic Inflammation Model

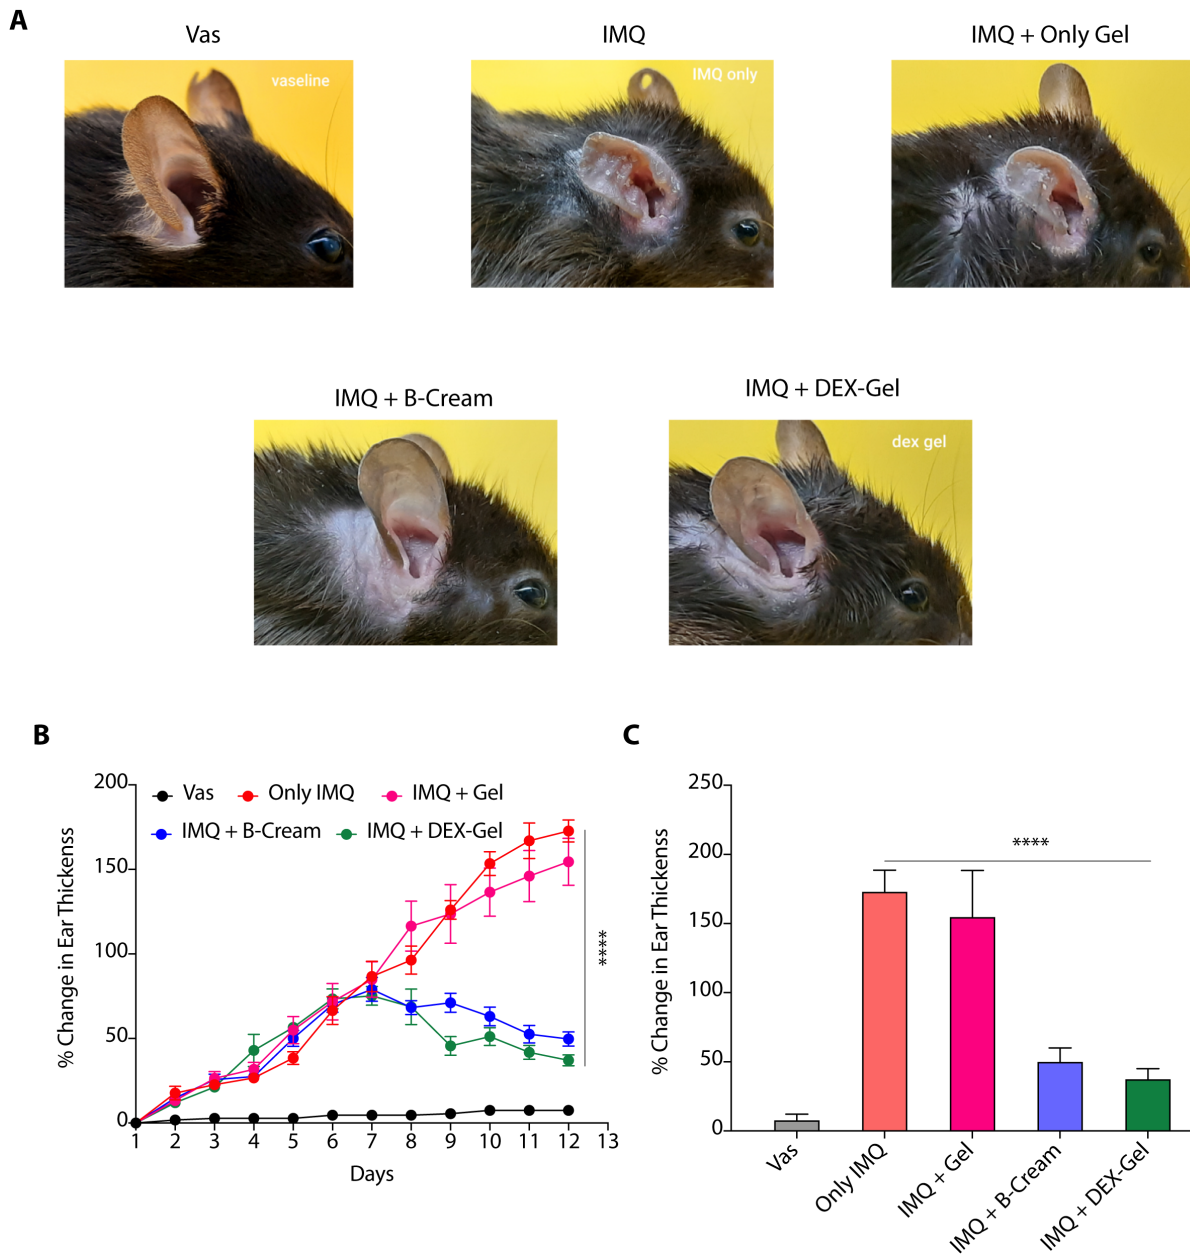

**Figure S1. (A)** Representative digital images of the mice ear upon different treatments for testing the efficacy of DEX-Gel in chronic IMQ psoriasis model. **(B, C)** Change in kinetics of ear thickness **(B)** and percentage change in ear thickness **(C)** of mice at day 12 on different treatments.

# Effect of Dexamethasone entrapped Gel (DEX-Gel) in Chronic Inflammation Model

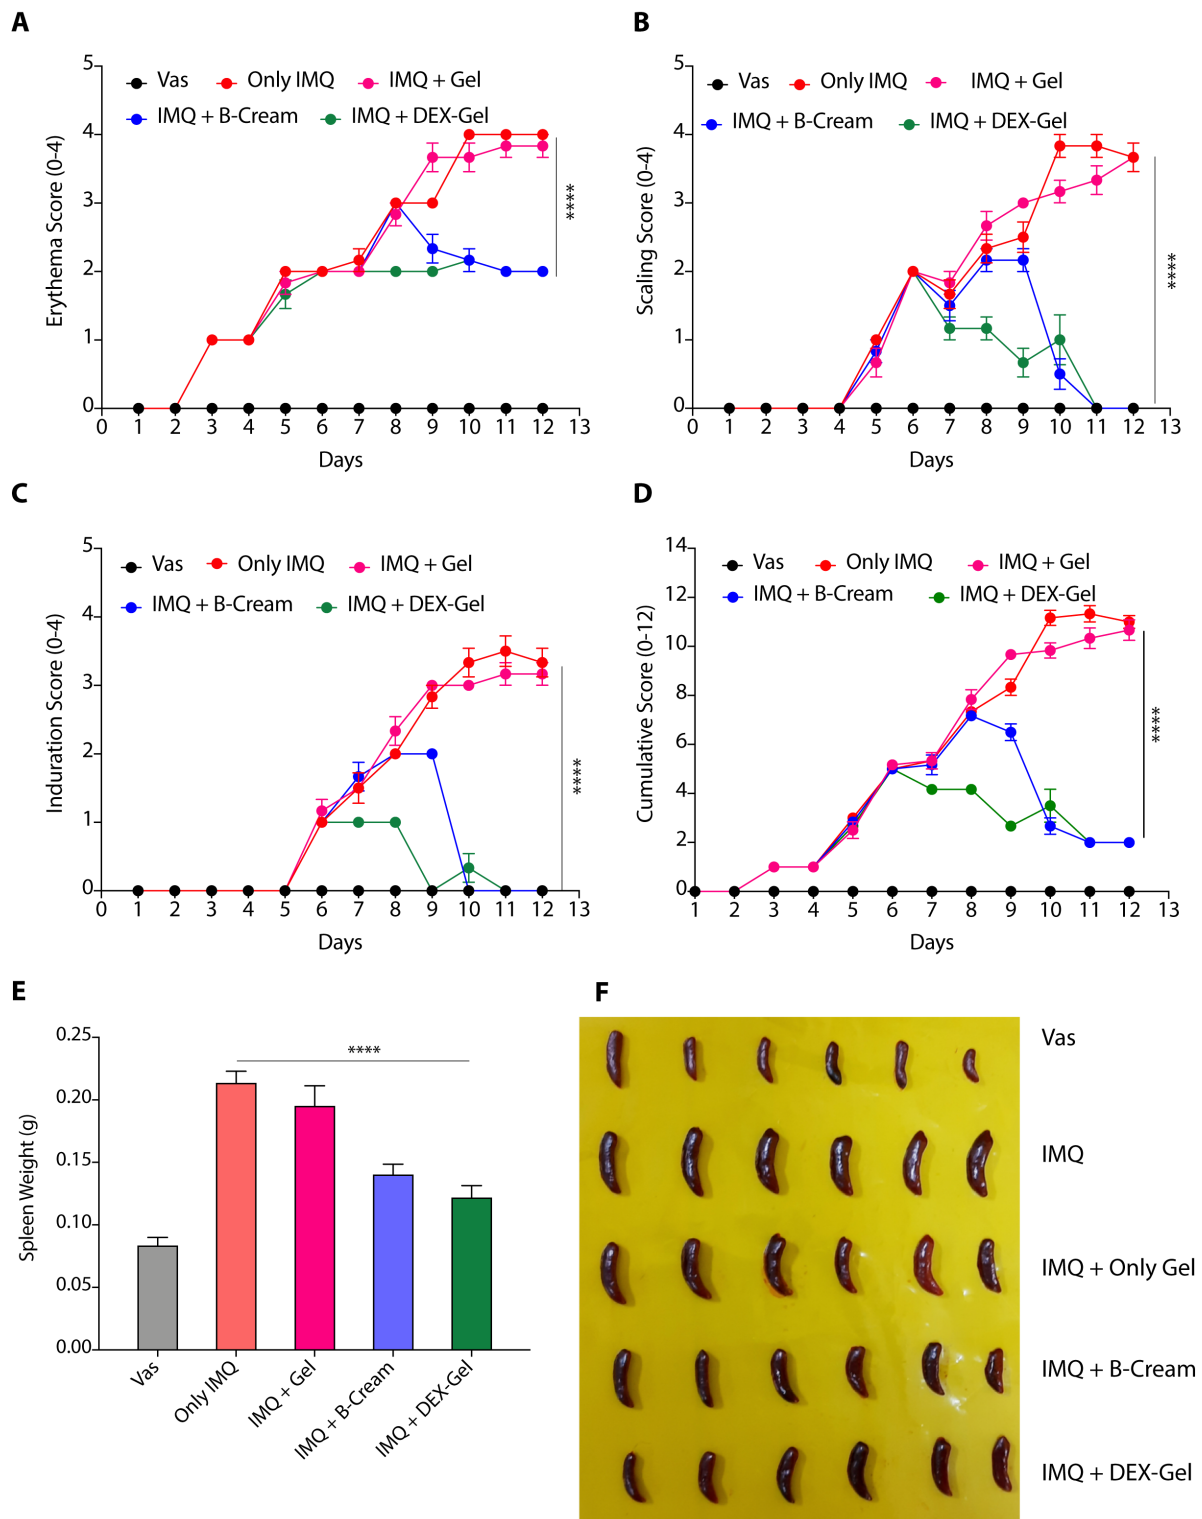

**Figure S2.** (A-D) Change in clinical score of erythema (A), induration (B), scaling (C), and cumulative PASI score (D) for disease severity on different treatments for testing the efficacy of DEX-Gel in chronic IMQ psoriasis model. (E, F) Change in weight of the spleen on different treatments (D), and pictures of spleen (E) excised at day 12.

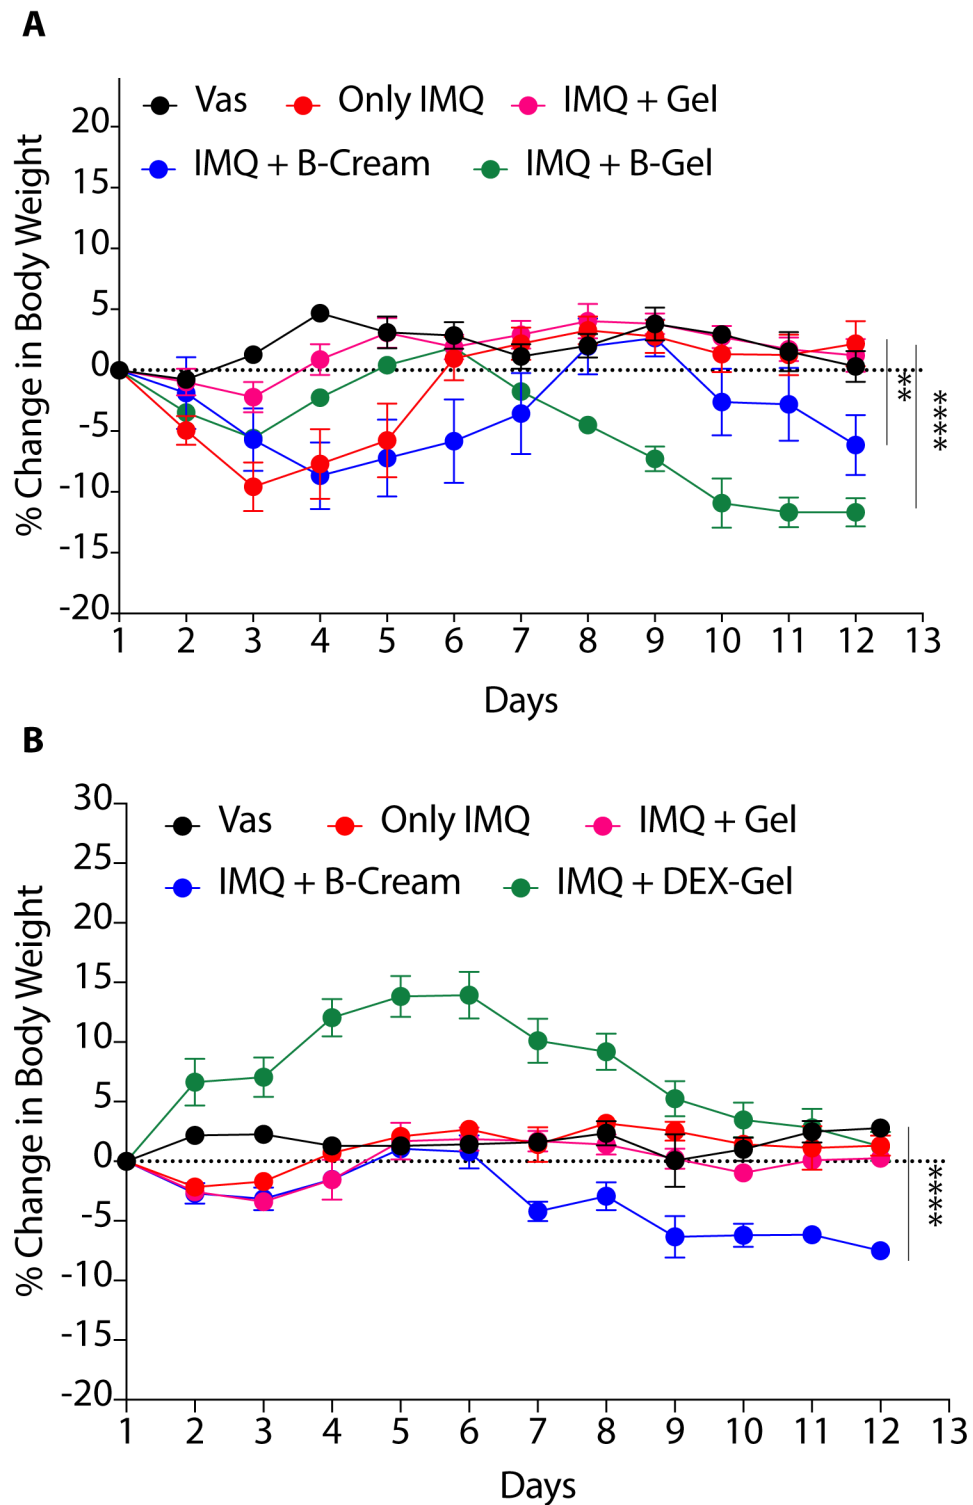

**Figure S3.** Percentage change in body weight of mice on different treatment in chronic psoriasis model for testing efficacy of B-Gel (A) and DEX-Gel (B).

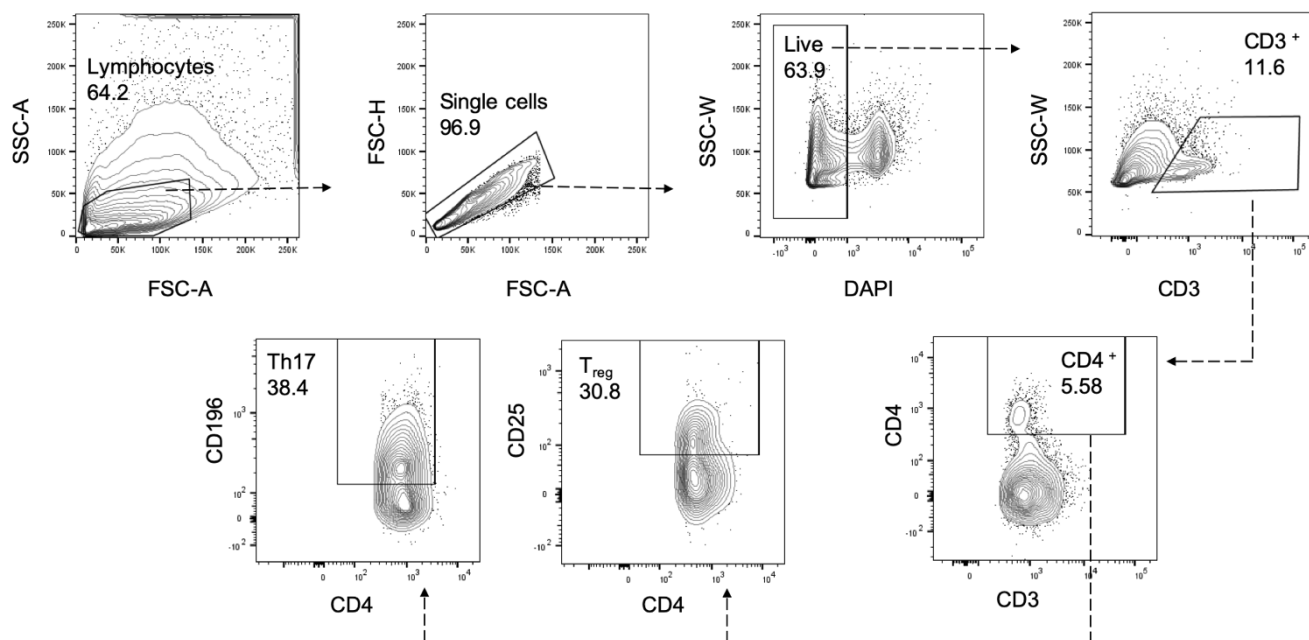

**Figure S4.** Gating strategy used for analysis of different CD4 T helper cell subsets.

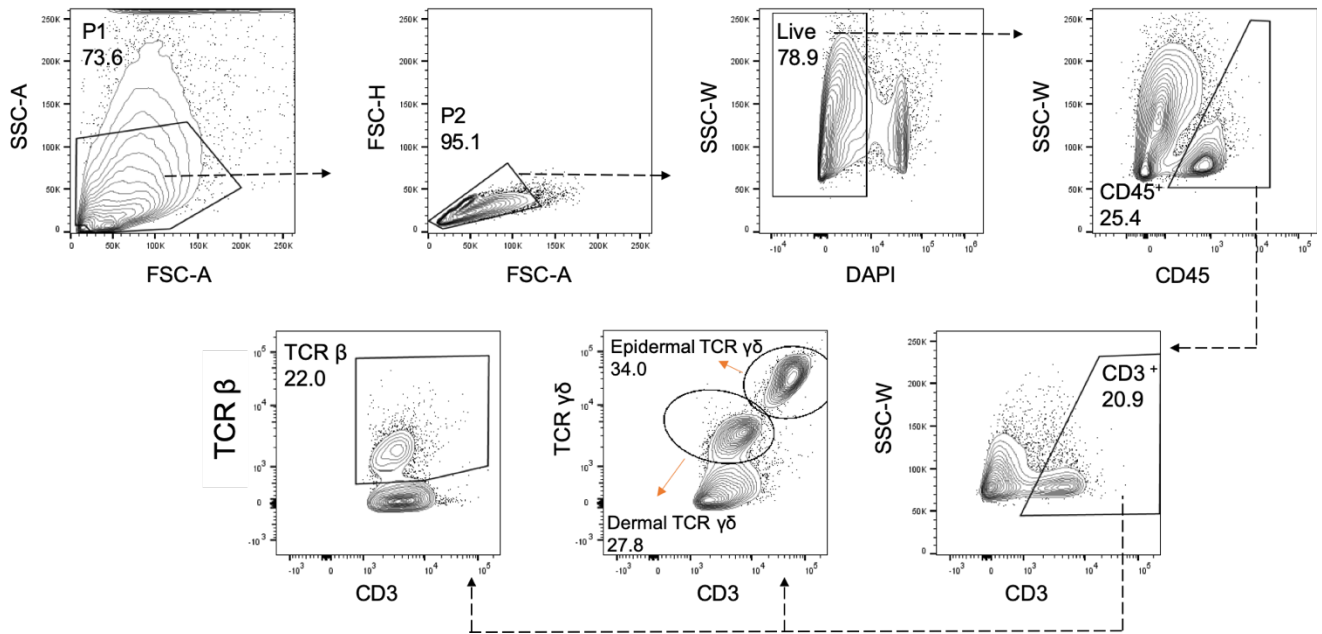

Figure S5. Gating strategy used for analysis of different TCR  $\gamma\delta$  cells

**Table S1. Sequences of the Primers used in the study.**

|                       |                             |
|-----------------------|-----------------------------|
| M_IL1b_RT_FP          | CGA CAA AAT ACC TGT GGC CT  |
| M_IL1b_RT_RP          | GGA TCC ACA CTC TCC AGC T   |
| M_TNF $\alpha$ _RT_FP | GCC TAT GTC TCA GCC TCT TC  |
| M_TNF $\alpha$ _RT_RP | CAT TTG GGA ACT TCT CAT CCC |
| M_CRAMP_RT_FP         | GCT GTA ACG AGC CTG GTG C   |
| M_CRAMP_RT_RP         | CTA CTA CTC TGG CTG AGG TAC |
| M_IL17a_RT_FP         | CTG TGT CTC TGA TGC TGT TG  |
| M_IL17a_RT_RP         | CGC CAA GGG AGT TAA AGA C   |
| M_IL17f_RT_FP         | GGATTACAACATCACTCGAG        |
| M_IL17f_RT_RP         | CAGGATTTCTTGCTGAATGG        |
| M_K16_RT_FP           | GAACCATGAGGAGGAGATGCTTG     |
| M_K16_RT_RP           | GATTAGATCACTGTTAGAGGCCA     |
